# Supplementary material
Source: publisher figshare collection journal article supplement (https://sage.figshare.com/ndownloader/files/20045804)
Supplement: Supplementary file 1 [file 20045804]

**Supplementary Figure 1:** Validation of miR-210 *in situ* hybridization. No signal was detected with the negative control probe (scramble probe). The miR-21 (positive control) was detected mainly in stromal fibroblasts. miR-210 expressing cells in the TME did not express miR-21. Magnification 20x (Scale bar: 50  $\mu$ m).

scramble

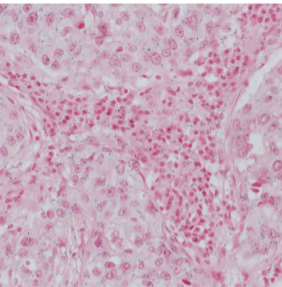

miR-210

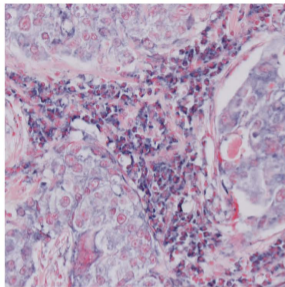

miR-21

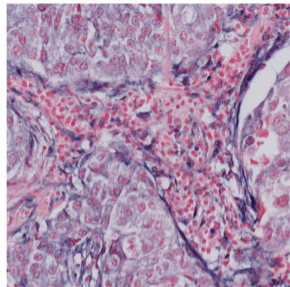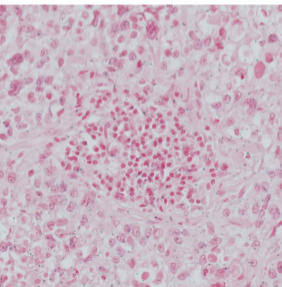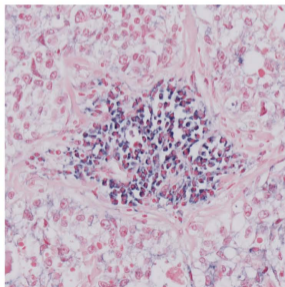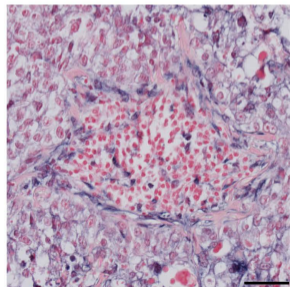

50µm

**Supplementary Figure 2:** CK5/6, P63 and EGFR expression. A) A total of 23 TNBC were stained for CK5/6, P63 and EGFR. The proportion of cells in the TME expressing miR-210 is also indicated (+ to +++ from very few miR-210 positive to high number of miR-210 positive immune cells). B) Representative images of positive and negative immunostaining for CK5/6, P63 and EGFR. Magnification 10x (Scale bar: 250  $\mu$ m).
